# Supplementary material for: Photothermally activatable PDA immune nanomedicine combined with PD-L1 checkpoint blockade for antimetastatic cancer photoimmunotherapy
Source: Royal Society of Chemistry journal article supplement (doi:10.1039/c9tb00089e), 2019-01-01
Supplement: c9tb00089e1.pdf [file c9tb00089e1.pdf]

## **Supplementary Information**

### **Photothermal-Activatable PDA Immune Nanomedicine Combine with PD-L1 Checkpoint Blockade for Anti-metastatic Cancer Photoimmunotherapy**

Qianglan Lu<sup>a</sup>, Qi Sun<sup>a</sup>, Peishan Li<sup>a</sup>, Lifang Yang<sup>a</sup>, Shan Yang<sup>a</sup>, Yidan Wang<sup>a</sup>, Yu Cheng<sup>a</sup>,  
Yilin Song<sup>a</sup>, Siyu Wang<sup>a</sup>, Fengping Tan<sup>\*a</sup> and Nan Li<sup>\*a</sup>

Correspondence to: Nan Li mail addresses: [linan19850115@163.com](mailto:linan19850115@163.com) (N. Li).

*<sup>a</sup>Tianjin Key Laboratory of Drug Delivery and High-Efficiency, School of Pharmaceutical Science and Technology, Tianjin University, Tianjin 300072, China*

To calculate the photothermal conversion efficiency ( $\eta$ ) of the final formulation, the temperature change was recorded as a function of time under continuous 808 nm laser irradiation with a  $1.5 \text{ W/cm}^2$  power density until the solution reached a steady state temperature. The  $\eta$  value was calculated by the following formula<sup>1</sup>:

$$\eta = \frac{hS(T_{\max} - T_{\text{Surr}}) - Q_s}{I(1 - 10^{-A_{808}})} \quad (1)$$

where  $h$  is the heat transfer coefficient,  $S$  is the surface area of the container,  $T_{\max}$  is The equilibrium temperature ( $T_{\max}$ ) is  $52.4^\circ\text{C}$ , the ambient temperature ( $T_{\text{Surr}}$ ) is  $24.9^\circ\text{C}$ ,  $Q_s$  is heat dissipated from the light absorbed by the container itself, which was determined independently to be  $3.5 \text{ mW}$  using a container, containing pure water. The incident laser power ( $I$ ) is  $1.5 \text{ W/cm}^2$  and the absorbance of the PDA-PEG-R848-CDs NPs at 808 nm ( $A_{808}$ ) is 0.348.

A dimensionless parameter  $\theta$  is calculated as followed:

$$\theta = \frac{T - T_{\text{Surr}}}{T_{\max} - T_{\text{Surr}}} \quad (2)$$

A sample system time constant  $\tau_s$  can be calculated as Eq.3.

$$t = -\tau_s \ln \theta \quad (3)$$

According to Fig. 3f, time constant for heat transfer from the system is determined to be  $\tau_s = 306.45 \text{ s}$  by applying the linear time data from the cooling period  $\text{vs } -\ln\theta$ .

$$hS = \frac{m_D C_D}{\tau_s} \quad (4)$$

In addition,  $m_D$  is 0.5g and  $C_D$  is 4.2 J/g °C.

Thus, substituting corresponding values of each parameter to Eq. 1, the photothermal conversion efficiency ( $\eta$ ) of the PDA-PEG-R848-CDs NPs could be calculated to be 22.41%.

Ref:

1. Roper, D. K.; Ahn, W.; Hoepfner, M., Microscale Heat Transfer Transduced by Surface Plasmon Resonant Gold Nanoparticles. *J Phys Chem C Nanomater Interfaces* **2007**, *111* (9), 3636-3641.

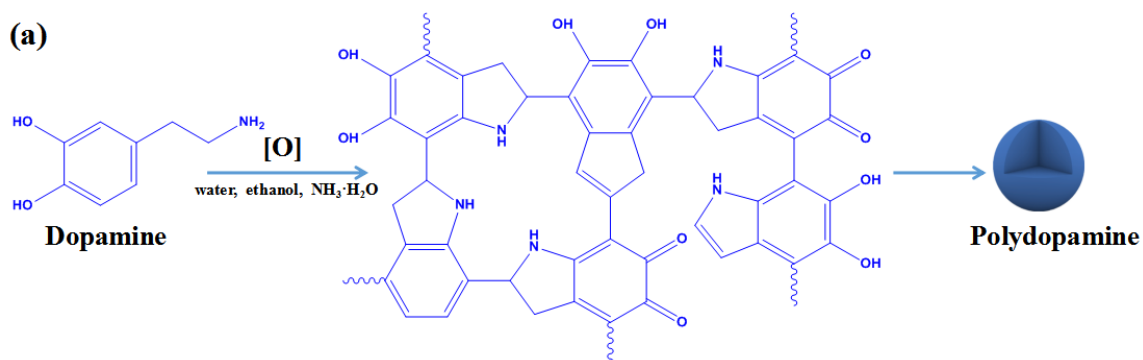

**Fig.S1.** (a) Schematic showing the preparation of PDA.

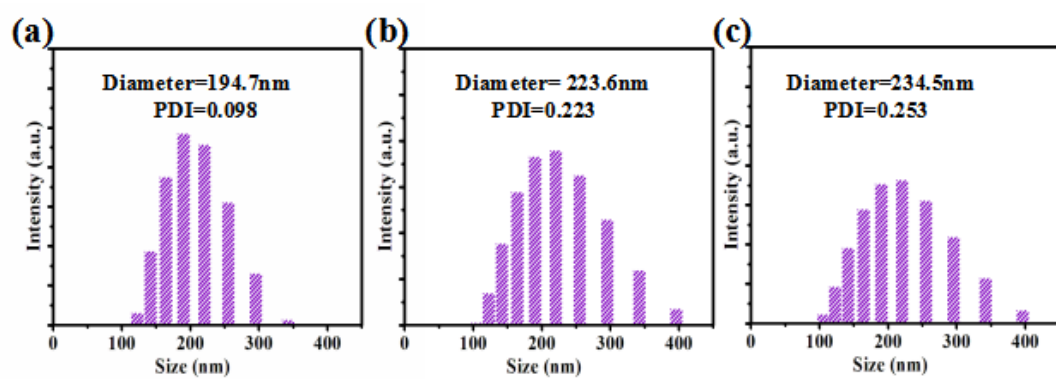

**Fig.S2.** Dynamic light scattering (DLS) size distribution of the PDA, PDA-PEG and PDA-PEG-R848-CDs nanoparticles.

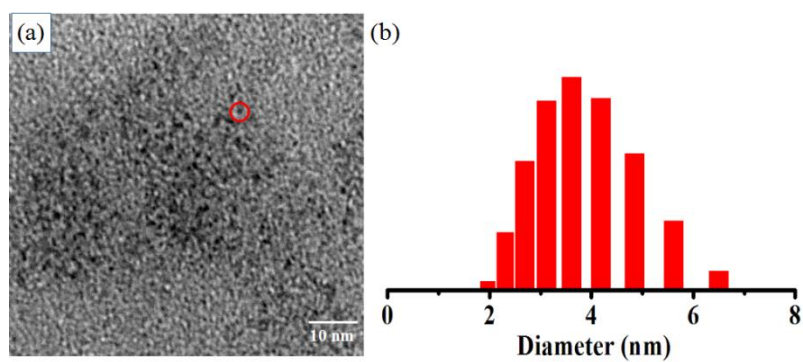

**Fig.S3.** (a) TEM images of CDs. (b) Dynamic light scattering (DLS) size distribution of the CDs.

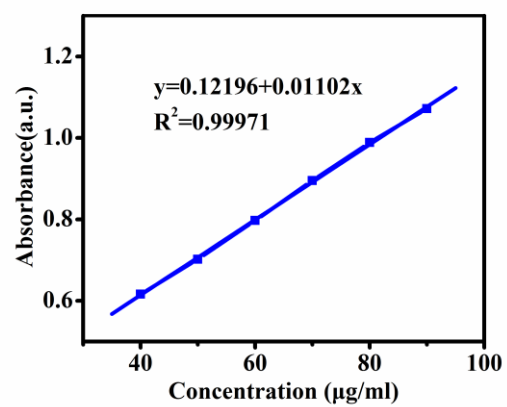

**Fig.S4.** (a) Calibration curve between the concentration of R848 and its absorbance at 320 nm. The loading efficiency.

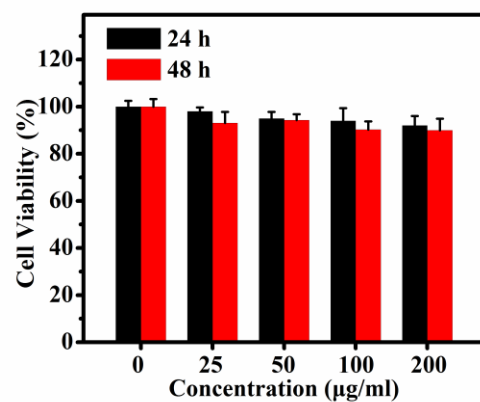

**Fig.S5.** Cytotoxicity of the PDA-PEG-R848-CDs NPs in 4T-1 cells after 24 and 48 h incubation.

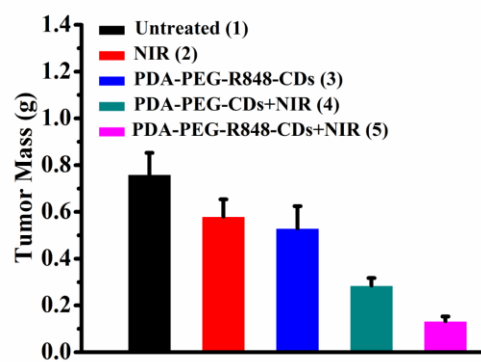

**Fig.S6.** The average tumor weights of different groups taken out from mice at the end of treatment.

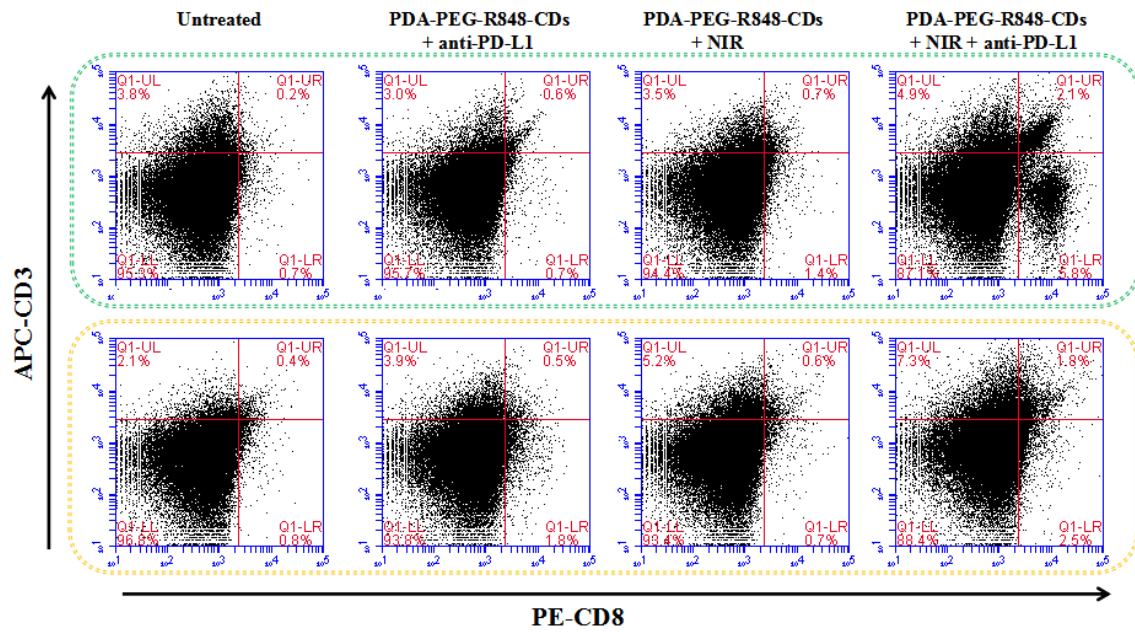

**Fig.S7.** Flow cytometry analysis of 4T1 cells for primary tumors (green box :left tumor) and distant tumor (yellow box :right tumor) after various treatments. Data are presented as means  $\pm$  SD (n = 3), \*\* $P < 0.01$ .
